# Supplementary material
Source: PubMed Central journal article supplement (PMC6018707)
Supplement: jc.2017-01798.st1.pdf [file jc.2017-01798.st1.pdf]

## Supplementary data

The role of *NRG1* in the predisposition to papillary thyroid carcinoma

Huiling He<sup>1</sup>, Wei Li<sup>1</sup>, Sandya Liyanarachchi<sup>1</sup>, Yanqiang Wang<sup>1</sup>, Lianbo Yu<sup>2</sup> Luke K. Genutis<sup>1</sup>, Sophia Maharry<sup>1</sup>, John E. Phay<sup>3</sup>, Rulong Shen<sup>4</sup>, Pamela Brock<sup>5</sup>, Albert de la Chapelle<sup>1</sup>

<sup>1</sup> Department of Cancer Biology and Genetics; <sup>2</sup>Department of Biomedical Informatics, <sup>3</sup> Department of Surgery, <sup>4</sup>Department of Pathology, <sup>5</sup>Department of Internal Medicine, The Ohio State University Comprehensive Cancer Center, The Ohio State University, Columbus, Ohio, 43210, USA

| Supplemental Table 1. Clinicopathologic characteristics of the Ohio PTC cohort |                    |                          |                                    |                  |
|--------------------------------------------------------------------------------|--------------------|--------------------------|------------------------------------|------------------|
| Characteristics                                                                |                    | NRG1 expression analysis | Association and haplotype analysis |                  |
|                                                                                |                    | Case (n=163)             | Case (n=1359)                      | Control (n=1605) |
| Gender                                                                         |                    |                          |                                    |                  |
|                                                                                | Female             | 120                      | 1030                               | 1184             |
|                                                                                | Male               | 43                       | 329                                | 421              |
| Age_at_diagnosis                                                               |                    |                          |                                    |                  |
|                                                                                | Age < 45 yrs       | 84                       | 783                                | 754              |
|                                                                                | Age >= 45 yrs      | 79                       | 576                                | 851              |
| Histo_subtype                                                                  |                    |                          |                                    | Not applied      |
|                                                                                | Classic PTC        | 133                      | 792                                |                  |
|                                                                                | MicroPTC           | 9                        | 244                                |                  |
|                                                                                | Follicular variant | 9                        | 260                                |                  |
|                                                                                | Oncocytic variant  | 4                        | 26                                 |                  |
|                                                                                | Tall cell          | 3                        | 25                                 |                  |
|                                                                                | Columnar cell      | 1                        | 5                                  |                  |
|                                                                                | Diffuse sclerosing | 0                        | 3                                  |                  |
| Other variants*                                                                | 4                  | 4                        |                                    |                  |

\*Other variant (one case for each): oxyphilic cell, Hurthle cell, Warthin-like, or solid squamous cell in NRG1 expression analysis; solid squamous cell, clear cell, macrofollicular, and PTC cystic tumor in association and haplotype analysis.

| Supplemental Table 2. sequences of primers and probes |                                        |
|-------------------------------------------------------|----------------------------------------|
| <b>Realtime RT- PCR</b>                               |                                        |
| <b>NM_004495</b>                                      |                                        |
| NM_004495-For                                         | TCCCATTAGAATATCAGTATCCACAG             |
| NM_004495-Rev                                         | CATAAGCGACACACAGGATTC                  |
| NM_004495-probe                                       | AAGCACTCCCCTCCATTACACACAG              |
| <b>NM_001160008</b>                                   |                                        |
| NM_001160008-For                                      | CACTATACTTCCACAGCCCATC                 |
| NM_001160008-Rev                                      | GCTTTGCCCTTCGGTTTTAC                   |
| NM_001160008-probe                                    | AGAAACCCCTGATTCTACCGAGACT              |
| <b>NM_013958</b>                                      |                                        |
| 013958-For                                            | TCCCATTAGAATATCAGTATCCACAG             |
| 013958-Rev                                            | TGGTAAGACACATCTAGCTCTAGG               |
| 013958-probe                                          | ATACTTGTGCAAGTGCCCAAATGAGTTT           |
| <b>Luciferase assay</b>                               |                                        |
| Region1-F                                             | aatttactcgagAACTGCGCGTGAAACCTACT       |
| Region1-Rev                                           | ttaattagatctACCCAGAAAATGGAAAACC        |
| Region2-F                                             | aatttactcgagGTCCTACCGGGCGCCTAC         |
| Region2-Rev                                           | ttaattagatctCCTATAGCCCAGGTCCCCTACT     |
| Region3-F                                             | aatttactcgagTCAGTCCTGTGCTACGGAGA       |
| Region3-Rev                                           | ttaattagatctCAGCAAACAATTGGGTTCAA       |
| Region4-F                                             | aatttactcgagCAATGTTCTGTTAGCATTCTCCA    |
| Region4-Rev                                           | ttaattagatctTGGCATTGTTGGTTTTGTTTTCA    |
| Region5-F                                             | aatttactcgagCGCAAATGAATGAACTTCTGG      |
| Region5-Rev                                           | ttaattagatctAAAAGAAATCCGTTTTCAAGC      |
| Region6-F                                             | aatttactcgagTGGGATTTGTGTCTGTGCAT       |
| Region6-Rev                                           | ttaattagatctTGTTGGGATTACAGGCATGA       |
| Region7-F                                             | aatttactcgagTTGGGTGAATCTGTCATCTCA      |
| Region7-Rev                                           | ttaattagatctAAGTCAGAAAATAAATATGTGCGAAA |
| Region8-F                                             | aatttactcgagTGTGGGCCAGTTAAACCTCT       |
| Region8-Rev                                           | ttaattagatctGGAGAGTTAGGTGGCAAAGC       |
| Region9-F                                             | aatttactcgagTACTACCACCCACCCCACT        |
| Region9-Rev                                           | ttaattagatctCCCAGGTTTCACAATTGACC       |

| Continued Supplemental Table 2. |                             |
|---------------------------------|-----------------------------|
| <b>ChIP assay</b>               |                             |
| rs3802160-F                     | CACGGAAGGATCCAGAATTG        |
| rs3802160-Rev                   | ACCCCAGAAAATGGAAAACC        |
| rs4733128-F                     | GTCCTACCGGGCGCCTAC          |
| rs4733128-Rev                   | CCTATAGCCCAGGTCCCCTACT      |
| rs4733130-F                     | TCAGTCCTGTGCTACGGAGA        |
| rs4733130-Rev                   | GTTTGGGGCAGAGCTGATT         |
| rs7835688-F                     | CAATGTTCTGTTAGCATTCTCCA     |
| rs7835688-Rev                   | TGGCATTGTTTGTTCATCA         |
| rs17646763-F                    | CGCAAATGAATGAACTTCTGG       |
| rs17646763-Rev                  | AAAAGAAATCCGTTTTCAAGC       |
| rs7825175-F                     | TGGGATTTGTGTCTGTGCAT        |
| rs7825175-Rev                   | TGTTGGGATTACAGGCATGA        |
| rs2439303&4-F                   | TTTGGTGTGTATAATTTTATTTGATGA |
| rs2439303&4-Rev                 | GTCCTCACCCAAGGGTTTCT        |
| rs2439302-F                     | CTGGAGTTCCTGAAAGCAG         |
| rs2439302-Rev                   | TGCAAGAATGGCCTAACACA        |
| rs2466076-F                     | CAATAAGCAGAGCCGATGAA        |
| rs2466076-Rev                   | CCCAGGTTTCACAATTGACC        |
| rs2466075-F                     | CGGCTCTGCTTATTGCCTAA        |
| rs2466075-Rev                   | CCCTATCTCCAGCCCACTAC        |
| <b>SNaPshot</b>                 |                             |
| rs2439302-For                   | tgtgggccagttaaacctct        |
| rs2439302-Rev                   | ggagagttaggtggcaaacg        |
| rs2439302-EXT                   | caatgtgtaatctttgttcata      |

| Supplemental Table 3. The features of 3 NRG1 isoforms                                                                |                 |                    |                 |                                 |                                |
|----------------------------------------------------------------------------------------------------------------------|-----------------|--------------------|-----------------|---------------------------------|--------------------------------|
| Reference gene ID                                                                                                    | UCSC Isoform ID | Transcript variant | Number of exons | Expression in TCGA <sup>a</sup> | Expression in OSU <sup>b</sup> |
| NM_013958.3                                                                                                          | uc003xis.2      | HRG-beta3          | 7               | 71.58                           | 2.86                           |
| NM_001160008.1                                                                                                       | uc011lbf.1      | HRG-beta2b         | 11              | 17.44                           | 0.86                           |
| NM_004495.3                                                                                                          | uc003xir.2      | HRG-gamma          | 6               | 1.52                            | 2.82                           |
| <sup>a</sup> Expression levels (FPKM, median) in unaffected thyroid tissues. RNA-Seq data obtained from TCGA (n=59). |                 |                    |                 |                                 |                                |
| <sup>b</sup> RNA-Seq data obtained from our previous study (n=12).                                                   |                 |                    |                 |                                 |                                |

| Supplemental Table 4. Candidate functional DNA variants in the ~32 kb DNA block             |                                 |                     |                    |                          |                |                            |                      |                          |                     |                                   |
|---------------------------------------------------------------------------------------------|---------------------------------|---------------------|--------------------|--------------------------|----------------|----------------------------|----------------------|--------------------------|---------------------|-----------------------------------|
| SNP ID                                                                                      | Position <sup>a</sup><br>(hg19) | Effective<br>Allele | Opposite<br>Allele | Case<br>EAF <sup>b</sup> | Control<br>EAF | Odds<br>ratio <sup>c</sup> | P value <sup>c</sup> | P value GTE <sup>x</sup> | RegulomeDB<br>score | Functional<br>assays <sup>d</sup> |
| rs3802160                                                                                   | 32404629                        | G                   | A                  | 0.535                    | 0.469          | 1.305                      | 2.06E-07             | 2.76984E-30              | 2b                  | Yes                               |
| rs3802158                                                                                   | 32404896                        | T                   | C                  | 0.535                    | 0.469          | 1.305                      | 2.06E-07             | 2.77203E-30              | 4                   | No                                |
| rs36213229                                                                                  | 32405517                        | T                   | G                  | 0.535                    | 0.469          | 1.305                      | 2.06E-07             | 2.37537E-30              | 4                   | No                                |
| rs7820838                                                                                   | 32405979                        | C                   | T                  | 0.828                    | 0.790          | 1.278                      | 0.000273             | 6.18786E-05              | 4                   | No                                |
| rs7834206                                                                                   | 32406148                        | A                   | C                  | 0.535                    | 0.469          | 1.305                      | 2.06E-07             | 2.70273E-30              | 4                   | No                                |
| rs73234136                                                                                  | 32406382                        | C                   | T                  | 0.535                    | 0.469          | 1.305                      | 2.06E-07             | 6.09176E-30              | 4                   | No                                |
| rs113350646                                                                                 | 32406549                        | A                   | G                  | 0.252                    | 0.217          | 1.218                      | 0.000778             | 6.1598E-23               | 4                   | No                                |
| rs4733128                                                                                   | 32406602                        | T                   | C                  | 0.535                    | 0.469          | 1.307                      | 1.74E-07             | 2.77246E-30              | 2b                  | Yes                               |
| rs4733129                                                                                   | 32406768                        | C                   | T                  | 0.535                    | 0.469          | 1.307                      | 1.74E-07             | 2.77203E-30              | 4                   | No                                |
| rs4733130                                                                                   | 32406994                        | C                   | T                  | 0.535                    | 0.469          | 1.303                      | 2.29E-07             | 2.77203E-30              | 2b                  | Yes                               |
| rs12548687                                                                                  | 32408820                        | G                   | A                  | 0.535                    | 0.469          | 1.307                      | 1.74E-07             | 3.01175E-30              | 4                   | No                                |
| rs7835688                                                                                   | 32411499                        | C                   | G                  | 0.536                    | 0.469          | 1.308                      | 1.67E-07             | 2.77203E-30              | 1f                  | Yes                               |
| rs17646763                                                                                  | 32411656                        | C                   | T                  | 0.536                    | 0.469          | 1.306                      | 1.89E-07             | 2.77203E-30              | 3a                  | Yes                               |
| rs2439312                                                                                   | 32412359                        | G                   | A                  | 0.828                    | 0.789          | 1.283                      | 0.000229             | 4.21578E-05              | 1f                  | No                                |
| rs9642727                                                                                   | 32414032                        | C                   | A                  | 0.535                    | 0.470          | 1.298                      | 3.95E-07             | 6.52708E-30              | 4                   | No                                |
| rs17646936                                                                                  | 32414074                        | G                   | A                  | 0.266                    | 0.308          | 0.816                      | 0.000527             | 1.40304E-08              | 4                   | No                                |
| rs17719705                                                                                  | 32414332                        | T                   | A                  | 0.535                    | 0.470          | 1.298                      | 3.95E-07             | 8.07485E-30              | 4                   | No                                |
| rs7825175                                                                                   | 32416274                        | A                   | G                  | 0.251                    | 0.216          | 1.215                      | 0.00107              | 6.21728E-21              | 1d                  | Yes                               |
| rs13258892                                                                                  | 32423537                        | T                   | C                  | 0.280                    | 0.326          | 0.803                      | 0.000129             | 1.36594E-08              | 4                   | No                                |
| rs35233333                                                                                  | 32429734                        | C                   | T                  | 0.269                    | 0.307          | 0.832                      | 0.001858             | 5.06777E-08              | 4                   | No                                |
| rs2439304                                                                                   | 32430371                        | G                   | A                  | 0.459                    | 0.516          | 0.794                      | 1.11E-05             | 1.33582E-23              | 3a                  | Yes                               |
| rs2439303                                                                                   | 32430375                        | C                   | T                  | 0.470                    | 0.534          | 0.775                      | 1.08E-06             | 1.50765E-24              | 3a                  | Yes                               |
| rs2439302                                                                                   | 32432369                        | C                   | G                  | 0.468                    | 0.534          | 0.767                      | 5.47E-07             | 6.46589E-25              | 1f                  | Yes                               |
| rs2466077                                                                                   | 32432753                        | T                   | G                  | 0.465                    | 0.531          | 0.769                      | 6.86E-07             | 8.78949E-25              | 4                   | No                                |
| rs2466076                                                                                   | 32432796                        | T                   | G                  | 0.465                    | 0.531          | 0.769                      | 6.86E-07             | 3.43194E-25              | 4                   | Yes                               |
| rs2466075                                                                                   | 32432949                        | G                   | A                  | 0.437                    | 0.496          | 0.791                      | 9.74E-06             | 1.43793E-24              | 3a                  | Yes                               |
| rs71512640                                                                                  | 32432957                        | A                   | G                  | 0.161                    | 0.193          | 0.800                      | 0.002864             | 5.85483E-07              | 3a                  | No                                |
| <sup>a</sup> Position is based on UCSC genome hg19. browser hg19.                           |                                 |                     |                    |                          |                |                            |                      |                          |                     |                                   |
| <sup>b</sup> EAF, effective allele frequency                                                |                                 |                     |                    |                          |                |                            |                      |                          |                     |                                   |
| <sup>c</sup> Odds ratio and p values for association analysis between the SNP and PTC risk. |                                 |                     |                    |                          |                |                            |                      |                          |                     |                                   |
| <sup>d</sup> Yes or No. CHIP and luciferase assays were performed or not.                   |                                 |                     |                    |                          |                |                            |                      |                          |                     |                                   |

| Supplemental Table 5. The top 10 diseases and biological functions                                              |                   |
|-----------------------------------------------------------------------------------------------------------------|-------------------|
| Category                                                                                                        | p-value           |
| Neurological Disease                                                                                            | 1.06E-06-8.94E-03 |
| Psychological Disorders                                                                                         | 1.74E-06-8.05E-03 |
| Cancer                                                                                                          | 1.87E-06-8.94E-03 |
| Organismal Injury and Abnormalities                                                                             | 1.87E-06-8.94E-03 |
| Reproductive System Disease                                                                                     | 1.87E-06-8.94E-03 |
| Cellular Growth and Proliferation                                                                               | 2.63E-06-8.94E-03 |
| Cell Death and Survival                                                                                         | 2.97E-06-8.94E-03 |
| Skeletal and Muscular Disorders                                                                                 | 3.32E-06-8.94E-03 |
| Cellular Compromise                                                                                             | 8.13E-06-8.94E-03 |
| Cellular Development                                                                                            | 8.79E-06-8.94E-03 |
| Ingenuity Pathway Analysis with the coding genes showing differential expression after siRNA knocking down NRG1 |                   |

| Supplemental Table 6. The top molecular functions                                                               |                     |            |
|-----------------------------------------------------------------------------------------------------------------|---------------------|------------|
| Name                                                                                                            | p- value            | #Molecules |
| Protein synthesis                                                                                               | 8.79E-03 - 1.77E-07 | 39         |
| Celluar growth and proliferation                                                                                | 8.84E-03 - 2.63E-06 | 83         |
| Cell death and survival                                                                                         | 8.84E-03 - 2.97E-06 | 74         |
| Cellualr compromise                                                                                             | 8.84E-03 - 8.13E-06 | 29         |
| Cellular development                                                                                            | 8.84E-03 - 8.79E-06 | 66         |
| Ingenuity Pathway Analysis with the coding genes showing differential expression after siRNA knocking down NRG1 |                     |            |

## Supplemental Figures

A

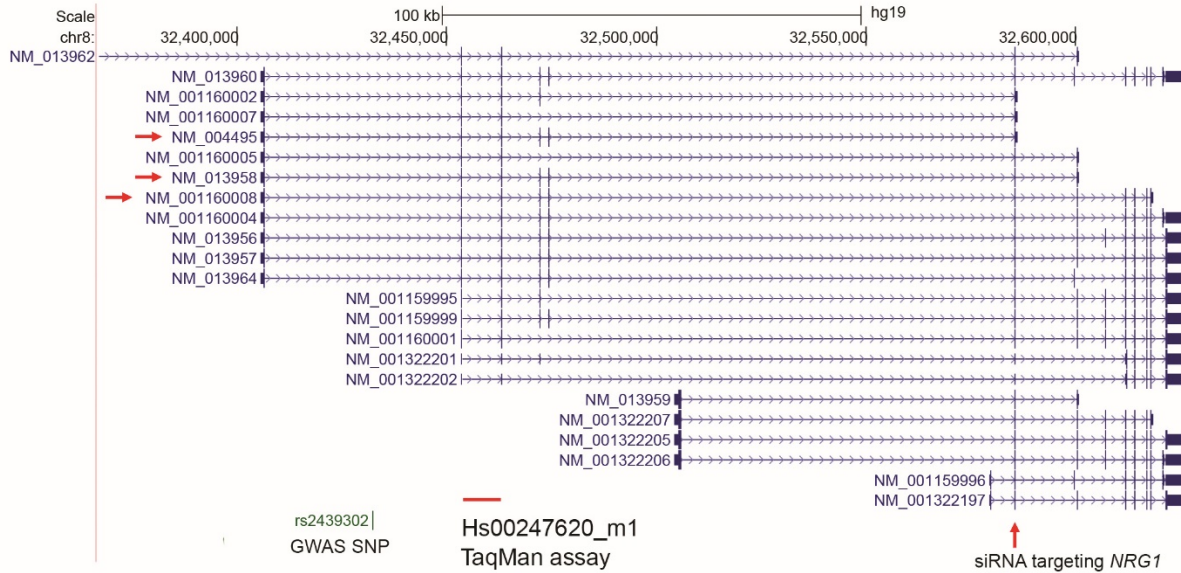

B

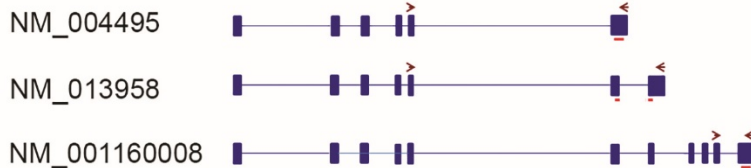

**Supplemental Figure 1. The *NRG1* gene structure and multiple isoforms.** (A) Three *NRG1* isoforms marked with red arrows were selected for gene expression analysis. The targeting locations of a predesigned TaqMan assay kit # Hs00247620\_m1 (<http://thermofisher.com>) and predesigned siRNA oligos (<http://dharmacon.gelifesciences.com/>) are marked with a red line or an arrow. (B) Diagram of the three *NRG1* isoforms and the probes and primers used in quantitative RT-PCR assays. Vertical lines represent exons. The specific probes are indicated by red lines under one or two exons. The PCR primers are labeled by arrows.

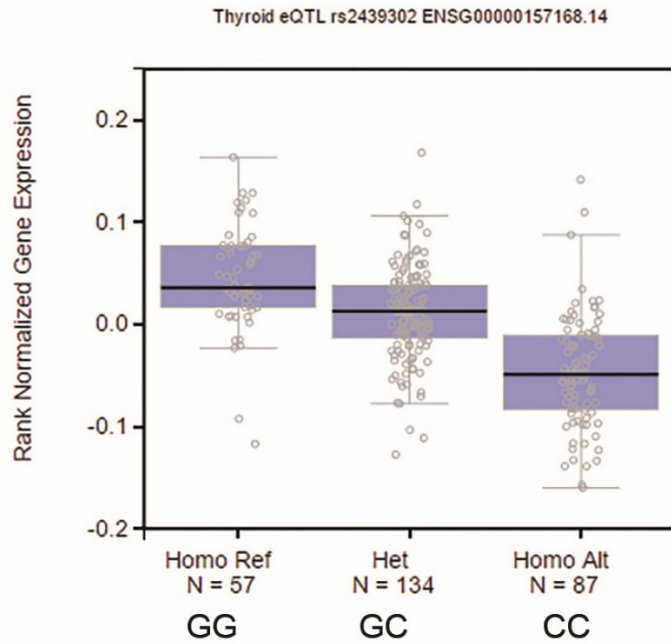

**Supplemental Figure 2. Correlation between the *NRG1* expression and the genotypes of rs2439302 in thyroid tissue samples.** The eQTL data were obtained from the GTEx consortium. (Date accessed July 6<sup>th</sup>, 2016; <http://www.gtexportal.org/home/>).

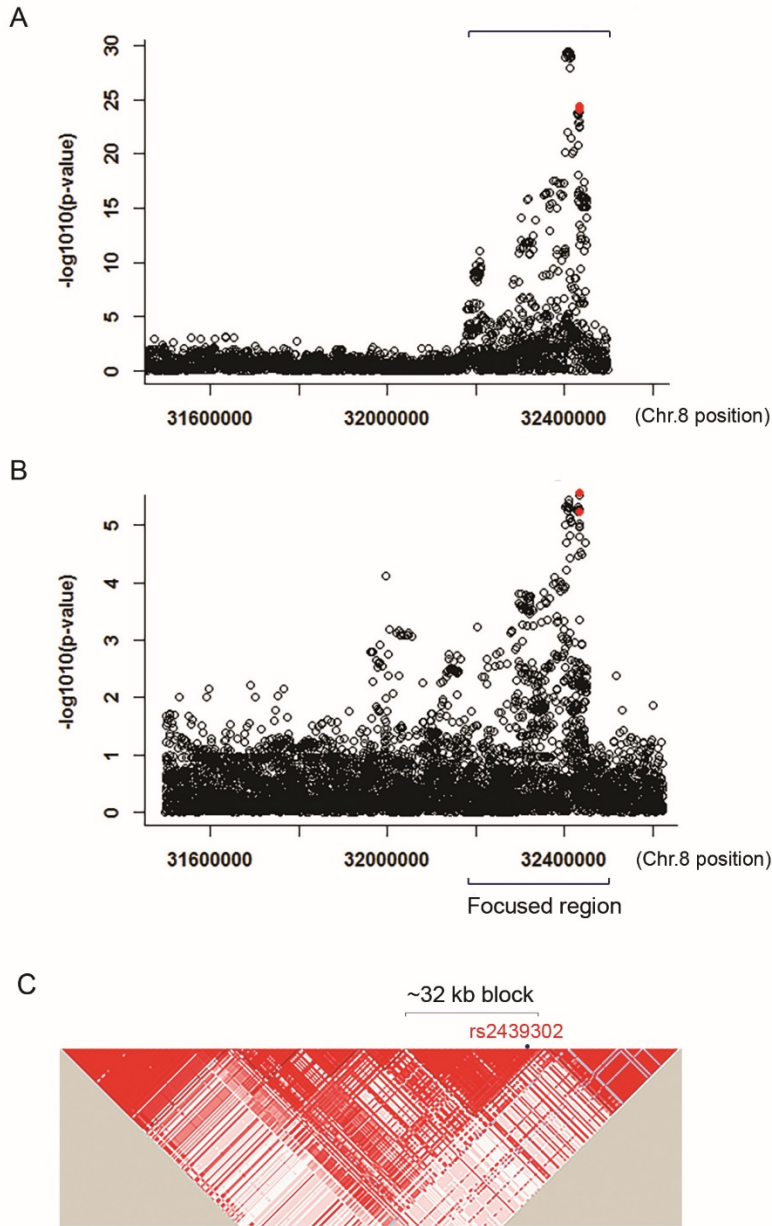

**Supplementary Figure 3: Variants in the *NRG1* genomic region.** (A) Plot of the association between the variants and the *NRG1* expression; the p values data are obtained from GTE<sub>x</sub>; (B) Plot of the association between the variants and PTC risk; the p values data are obtained from an association in an Ohio cohort of 1359 cases/1605 controls. The open dots representing SNPs; the two red dots representing the two GWAS SNPs rs2439302 and rs2466076; (C) LD analysis in the "Focused region" with HaploView (<https://www.broadinstitute.org/haploview/haploview>).



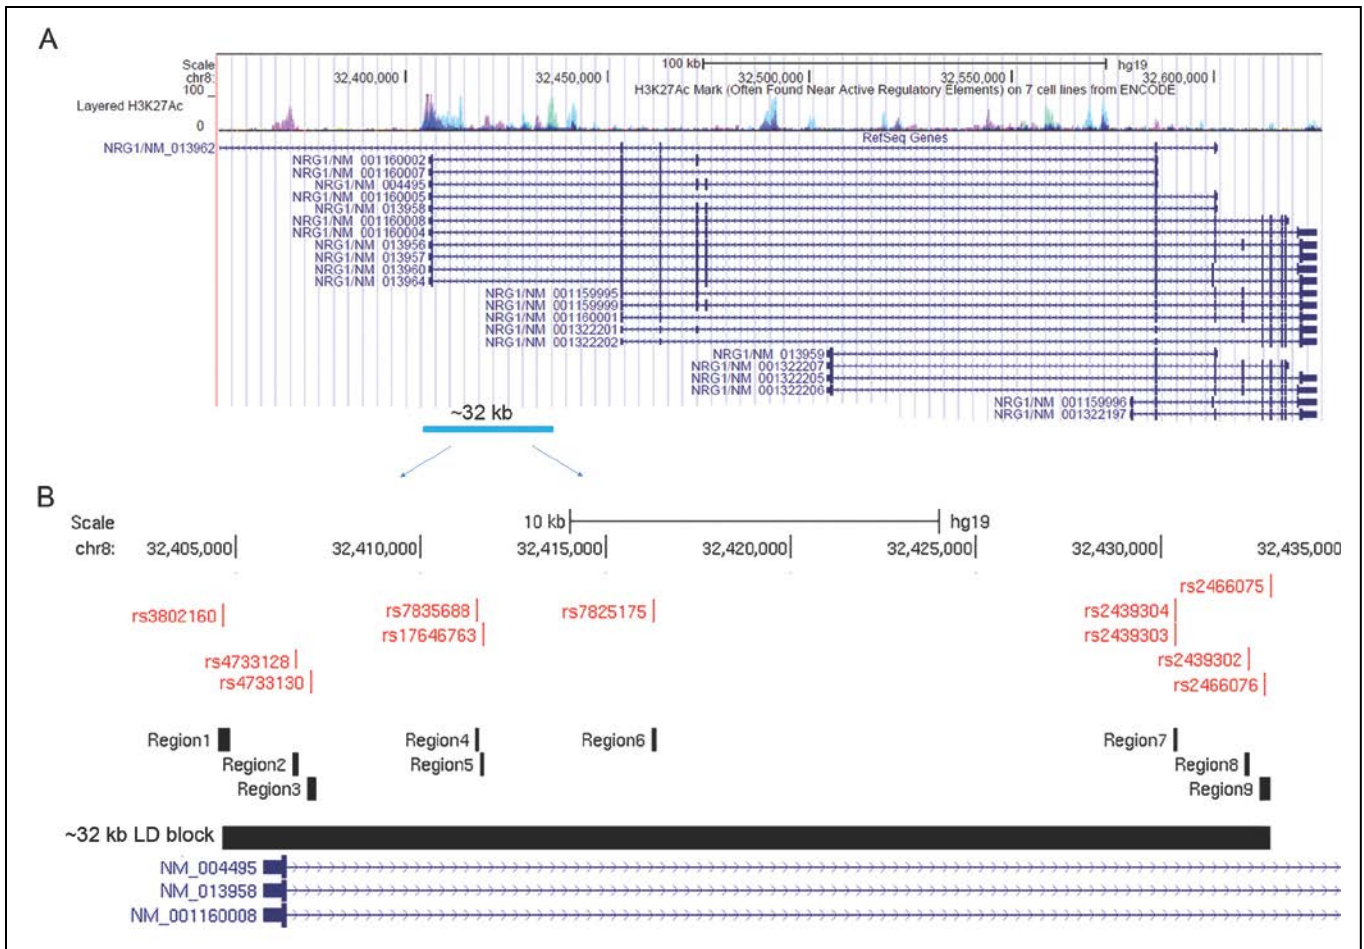

**Supplemental Figure 4. The ~32 kb LD block in the *NRG1* locus.** (A) Diagram of the layered H3K27Ac, the *NRG1* isoforms, and the ~32 kb LD block. All the information except the 32 kb block was obtained from UCSC genome browser (hg19) (<https://genome.ucsc.edu/>); (B) Selected functional candidate SNPs (n=11) and the cloned DNA fragments for the Luciferase assays are marked in the ~32 kb LD block.

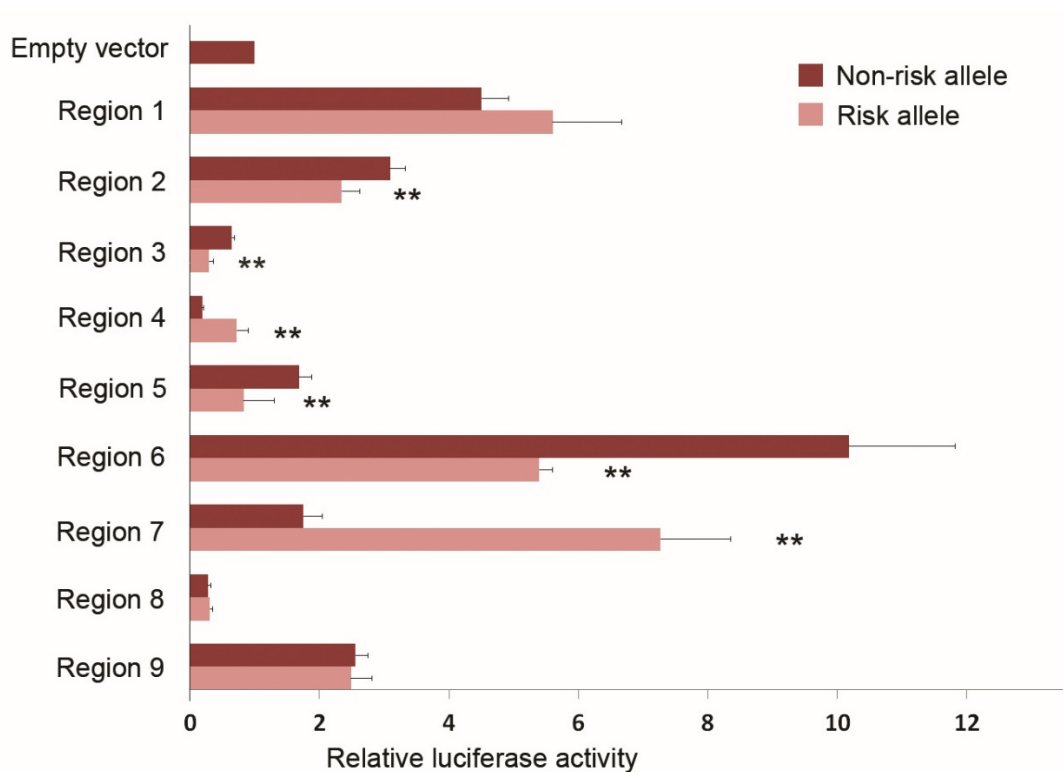

**Supplemental Figure 5. Luciferase assay in HeLa cells.** DNA fragments containing the risk or wild type alleles in each region were cloned into a Luciferase enhancer reporter vector with a minimal promoter. The luciferase assay was performed in at least three experiments. The luciferase activities were normalized with the empty vector control. \*\* indicating the p values < 0.01.
